# Supplementary material
Source: Springer Nature journal article supplement (https://hal.science/hal-01341266v1/file/12711_2013_2617_MOESM14_ESM.pdf)

## Angus

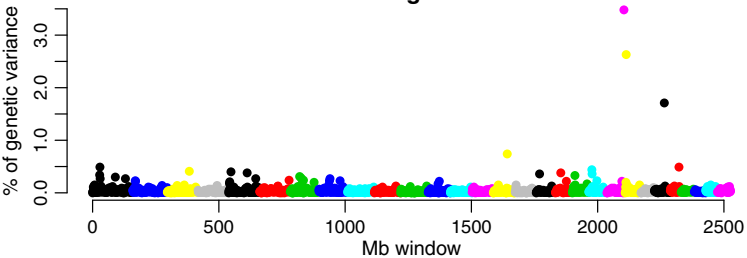

## Limousin

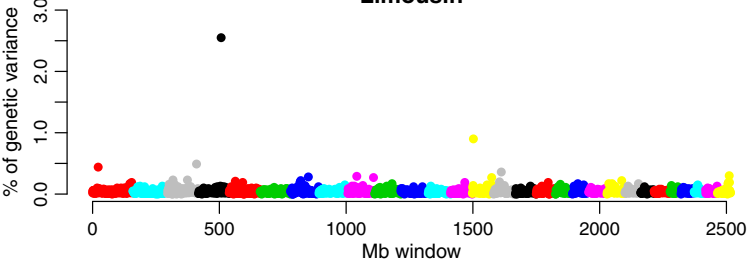

Supplement: MOESM14 [file 12711_2013_2617_MOESM14_ESM.pdf]
